# Supplementary figures and images for: Dendritic Na+ spikes enable cortical input to drive action potential output from hippocampal CA2 pyramidal neurons
Source: eLife journal article supplement (doi:10.7554/elife.04551), 2014-11-12

Figure 8 – figure supplement 2

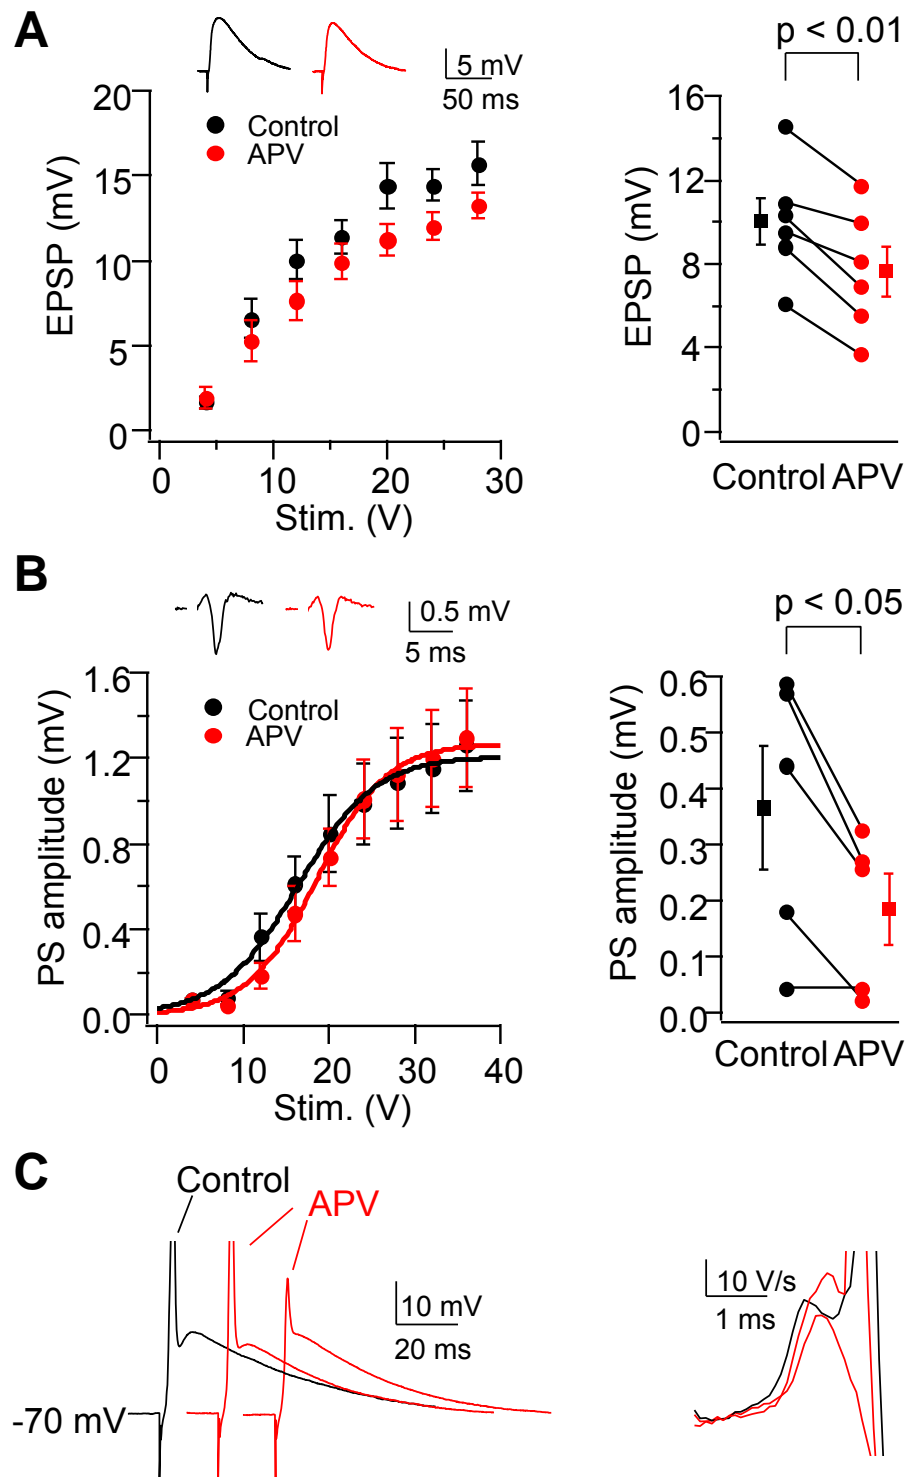

Supplement: supp [file elife-04551-supp-v1.zip]

Figure 6 – figure supplement 1

**A**

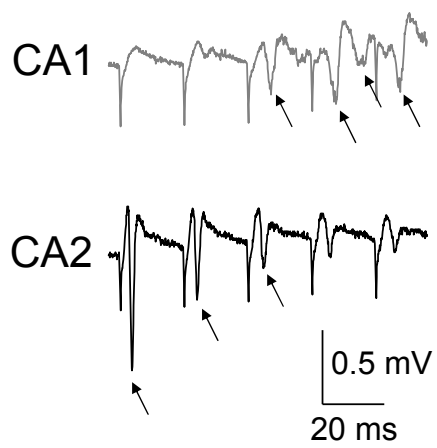

**B**

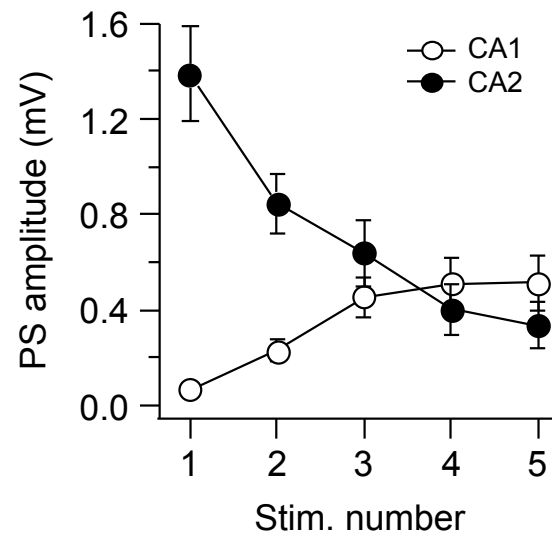

Supplement: supp [file elife-04551-supp-v1.zip]

Figure 10 – figure supplement 1

## Sholl analysis

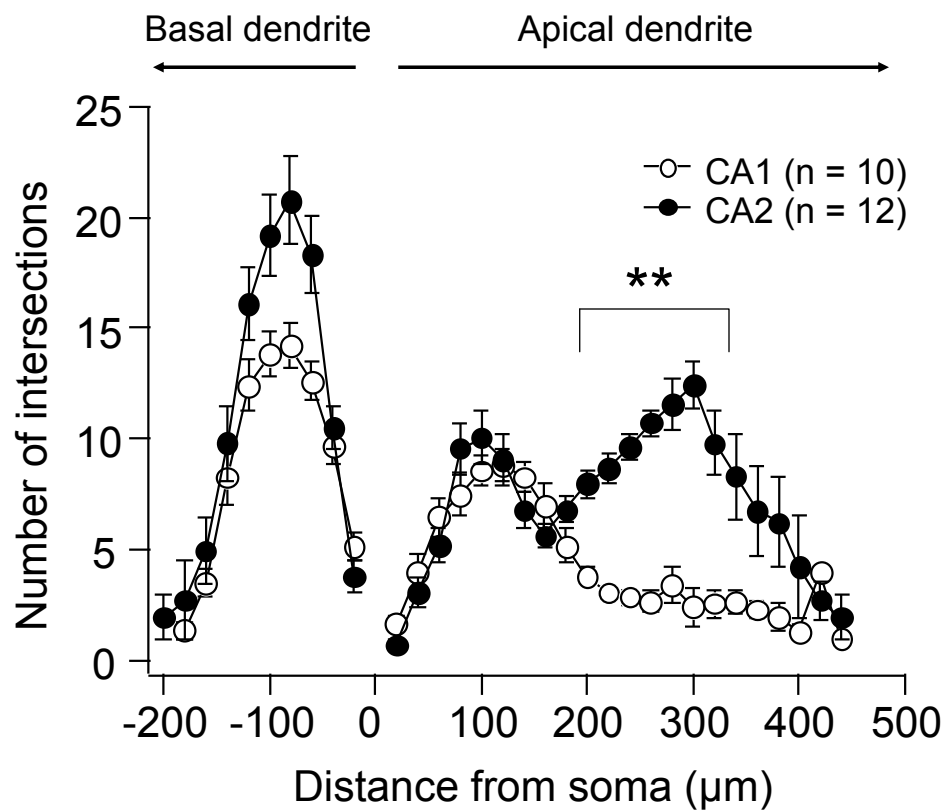

Supplement: supp [file elife-04551-supp-v1.zip]

Figure 9 – figure supplement 1

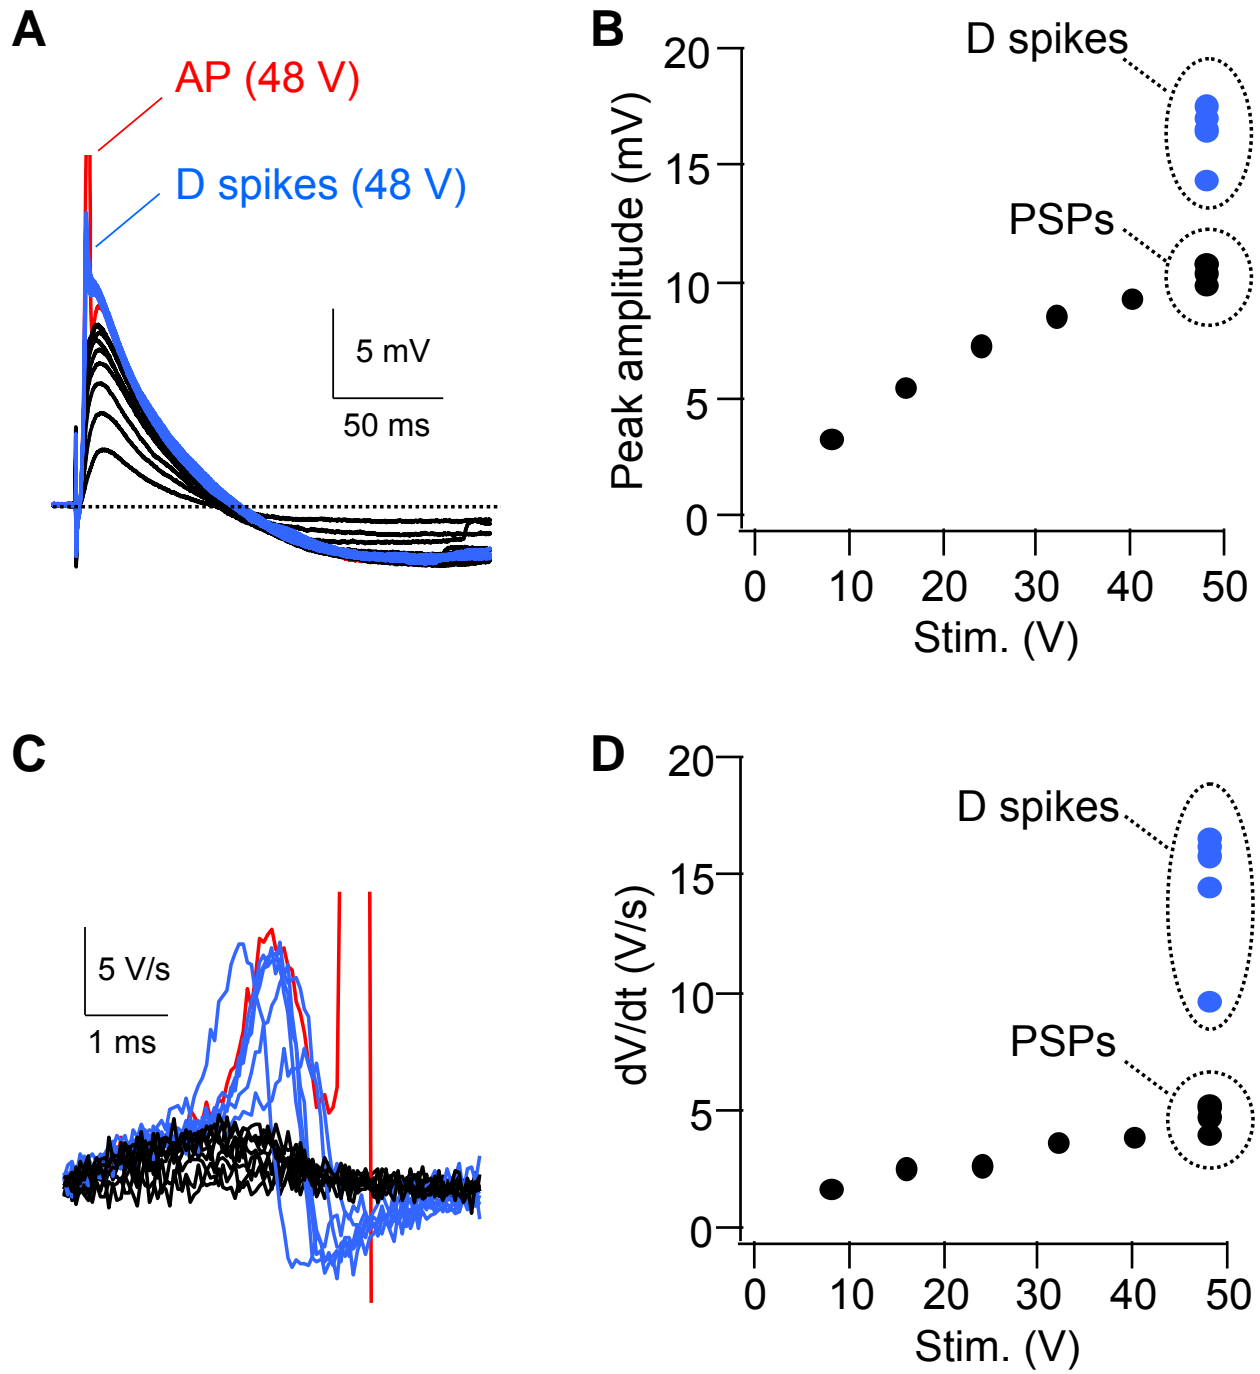

Supplement: supp [file elife-04551-supp-v1.zip]

Figure 1 – figure supplement 1

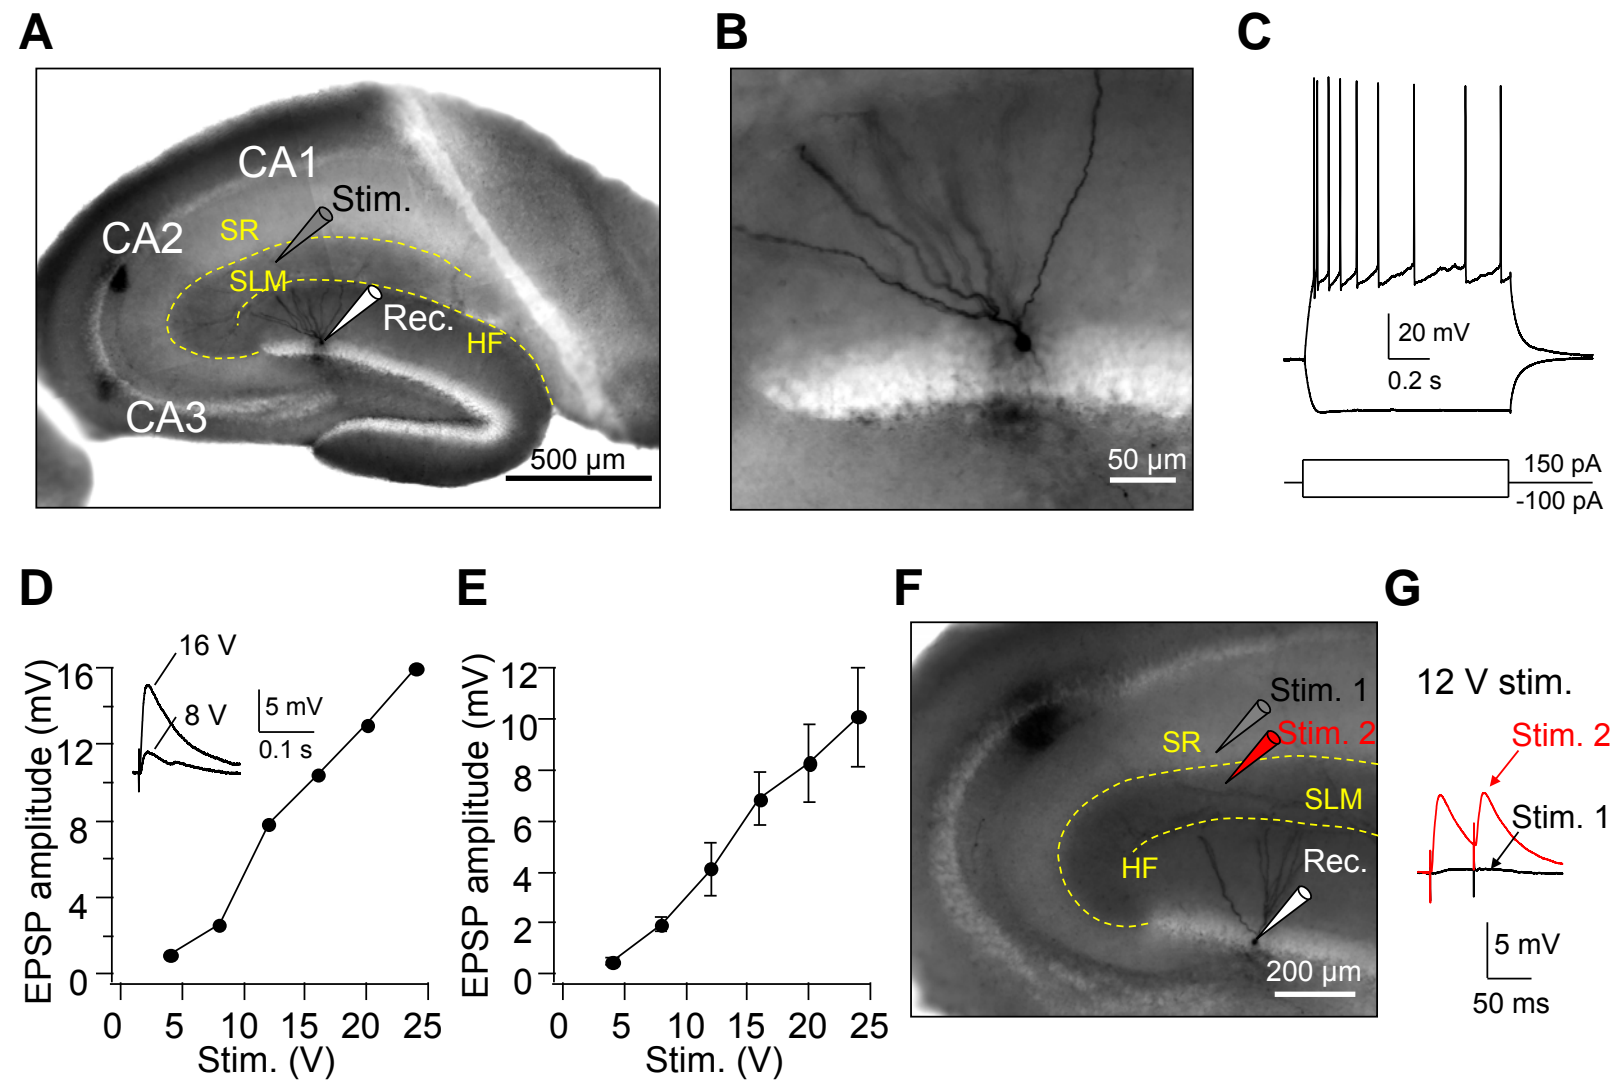

Supplement: supp [file elife-04551-supp-v1.zip]

Figure 2 – figure supplement 1

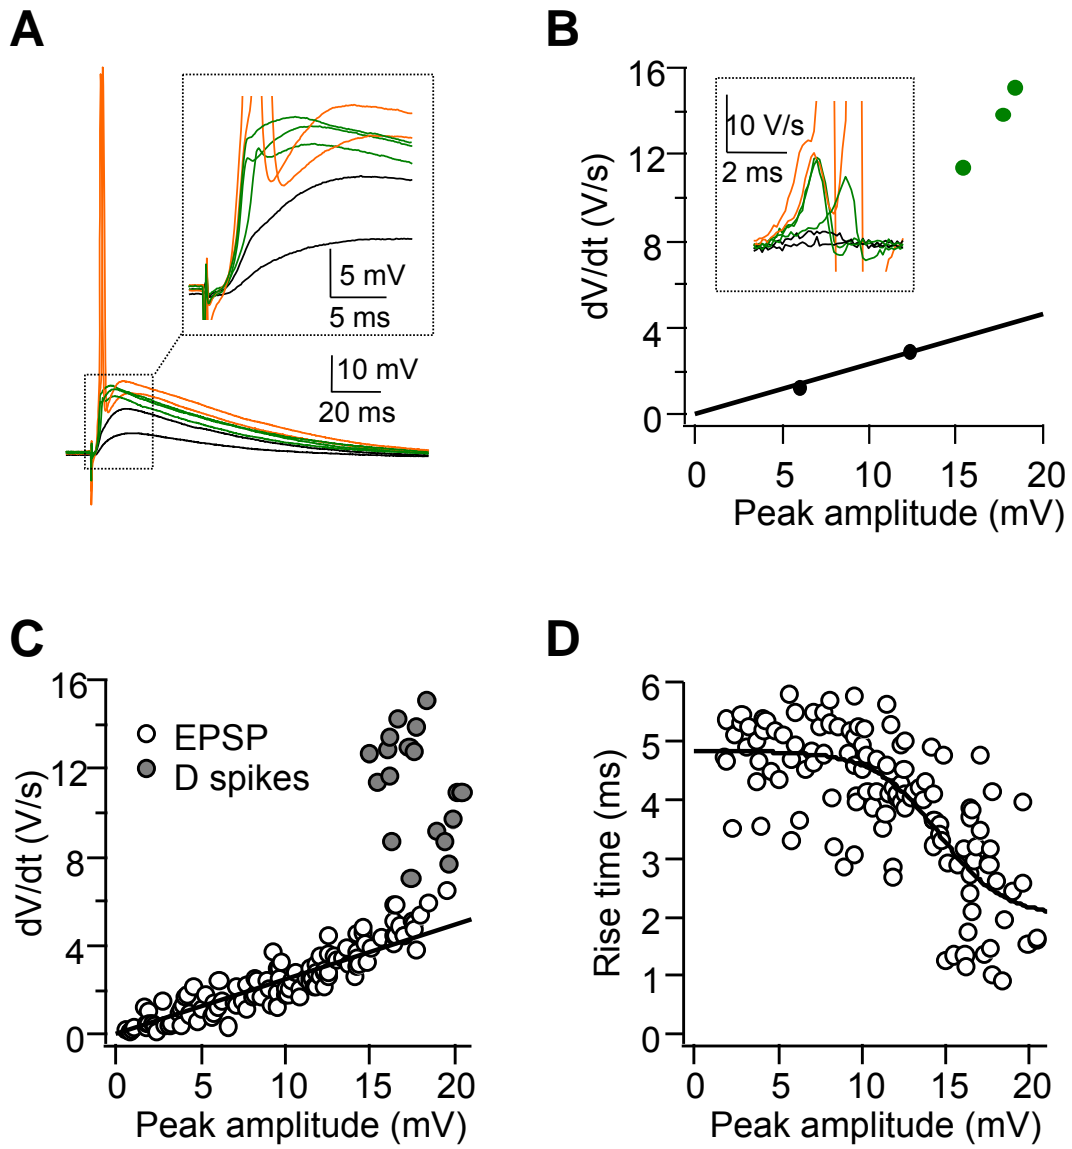

Supplement: supp [file elife-04551-supp-v1.zip]

Figure 5 – figure supplement 1

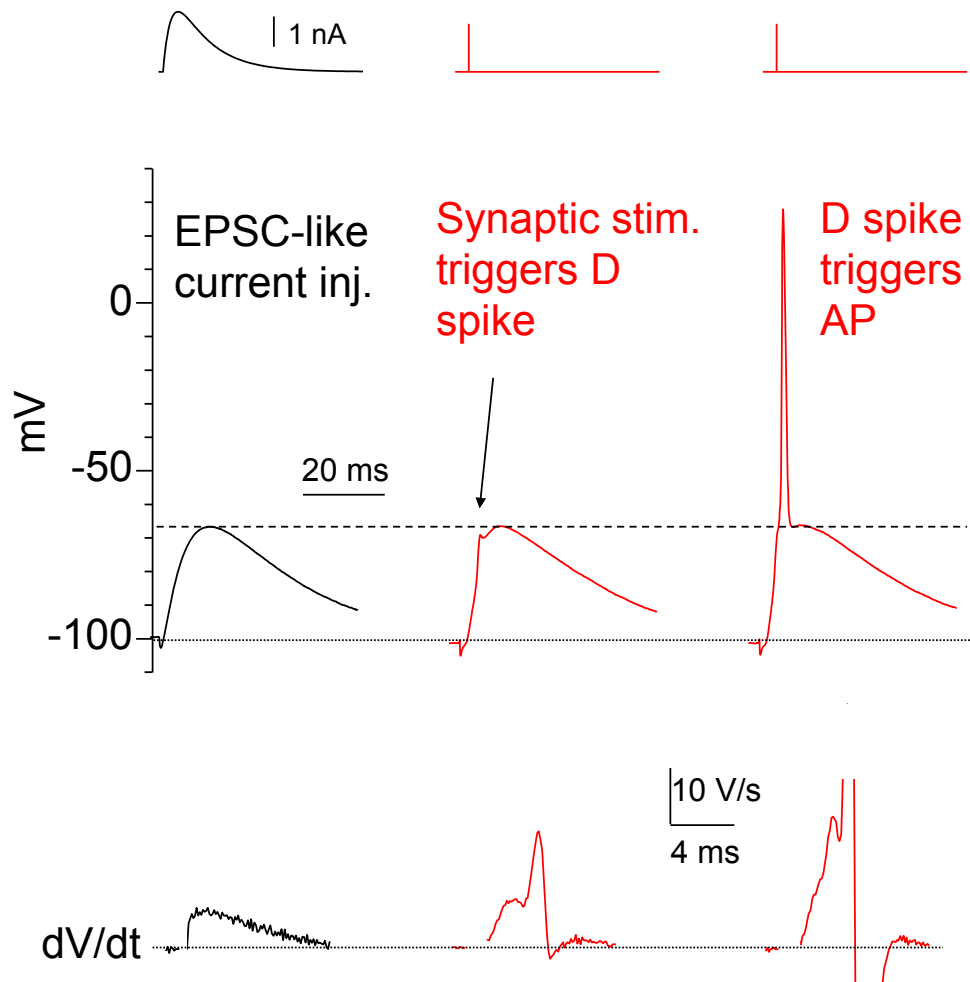

Supplement: supp [file elife-04551-supp-v1.zip]

Figure 8 – figure supplement 1

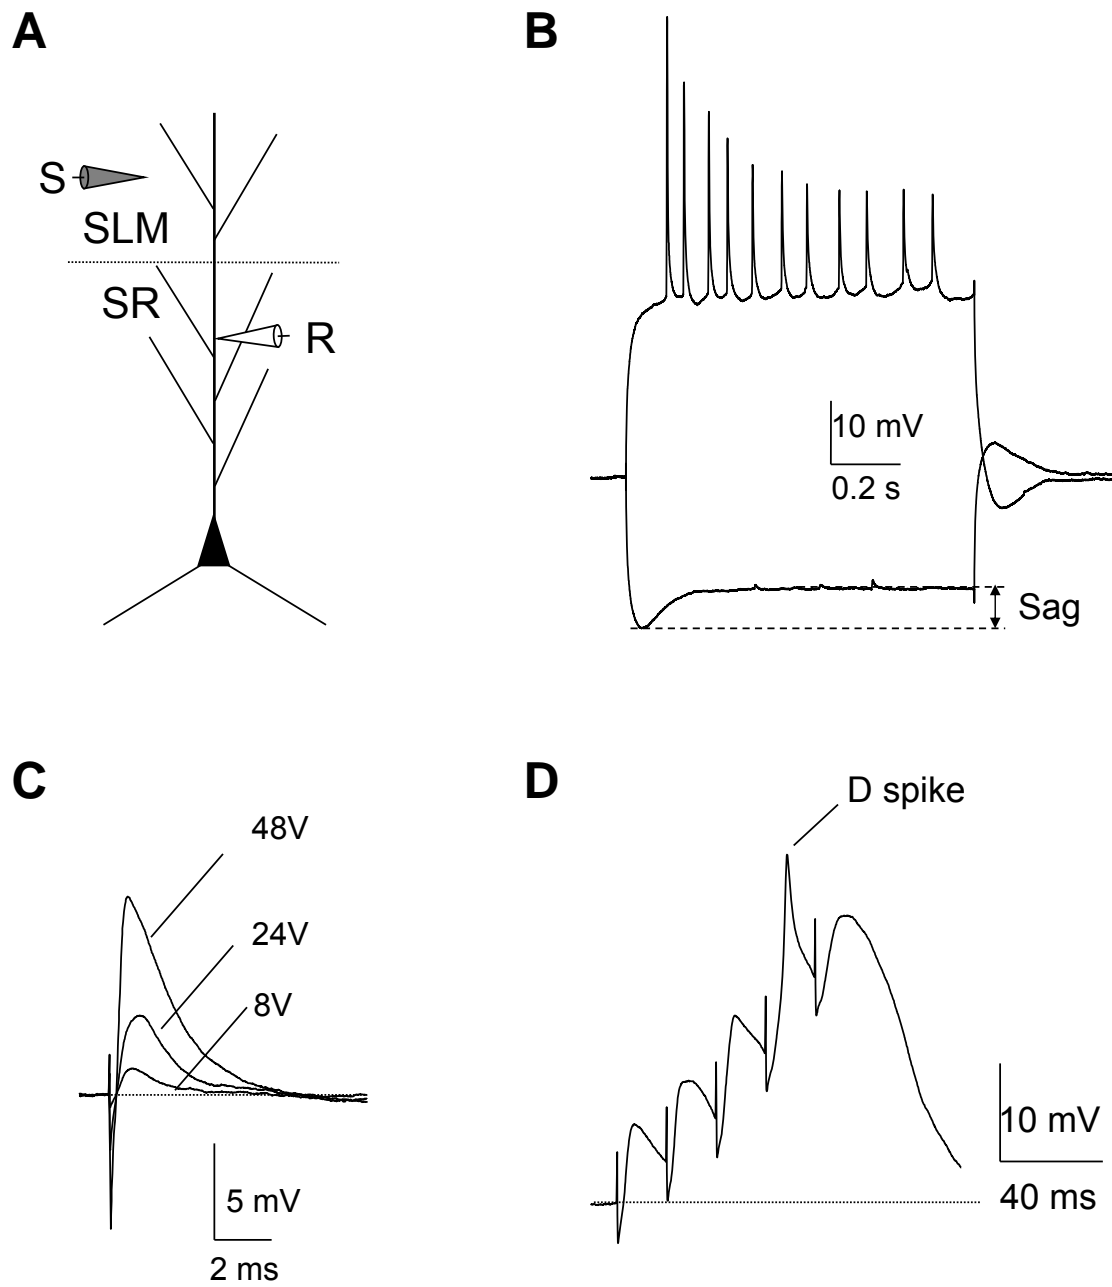

Supplement: supp [file elife-04551-supp-v1.zip]
